# Supplementary material for: Tracing Africa’s progress towards implementing the Non-Communicable Diseases Global action plan 2013–2020: a synthesis of WHO country profile reports
Source: Springer Nature journal article supplement (doi:10.1186/s12889-017-4199-6), 2017-04-05
Supplement: MOESM1 [file 12202230]

| Additional file 1: INDICATORS AND INCLUSION CRITERIA |                                                                                                                                                                                             |                      |      |      |                    |
|------------------------------------------------------|---------------------------------------------------------------------------------------------------------------------------------------------------------------------------------------------|----------------------|------|------|--------------------|
| No                                                   | Indicators                                                                                                                                                                                  | Report year assessed |      |      | Selection criteria |
|                                                      |                                                                                                                                                                                             | 2011                 | 2014 | 2015 |                    |
|                                                      |                                                                                                                                                                                             |                      |      |      | 2 ≥                |
| 1.                                                   | Set time-bound national targets and indicators based on WHO guidance by 2015                                                                                                                | √                    | √    | √    | Included           |
| 2.                                                   | Has a functioning system for generating reliable cause-specific mortality data on a routine basis by 2015                                                                                   | √                    | x    | √    | Included           |
| 3.                                                   | Has a STEPS survey or a comprehensive health examination survey every 5 years                                                                                                               | √                    | x    | √    | Included           |
| 4.                                                   | Has an operational multisectoral national strategy/action plan that integrates the major NCDs and their shared risk factors by 2015                                                         | x                    | √    | √    | Included           |
| 5.                                                   | Implemented the demand-reduction measures of the WHO FCTC at the highest level of achievement by 2015                                                                                       |                      |      |      | Included           |
| a.                                                   | Reduce affordability of tobacco products by increasing tobacco excise taxes                                                                                                                 | √                    | √    | √    | Included           |
| b.                                                   | Create by law completely smoke-free environments in all indoor workplaces, public places and public transport                                                                               | x                    | x    | √    | Excluded           |
| c.                                                   | Warn people of the dangers of tobacco and tobacco smoke through effective health warnings and mass media campaigns                                                                          | √                    | x    | √    | Included           |
| d.                                                   | Ban all forms of tobacco advertising, promotion and sponsorship                                                                                                                             | x                    | x    | √    | Excluded           |
| 6.                                                   | Implemented, as appropriate according to national circumstances, measures to reduce the harmful use of alcohol as per the WHO global Strategy to Reduce the Harmful Use of Alcohol          | √                    | √    | x    | Included           |
| a.                                                   | Regulations over commercial and public availability of alcohol                                                                                                                              | x                    | x    | √    | Excluded           |
| b.                                                   | Comprehensive restrictions or bans on alcohol advertising and promotions                                                                                                                    | x                    | x    | √    | Excluded           |
| c.                                                   | Pricing policies such as excise tax increases on alcoholic beverages                                                                                                                        | x                    | x    | √    | Excluded           |
| 7.                                                   | Implemented the measures to reduce unhealthy diets                                                                                                                                          | √                    | √    | x    | Included           |
| a.                                                   | Adopted national policies to reduce population salt/sodium consumption                                                                                                                      | x                    | x    | √    | Excluded           |
| b.                                                   | Adopted national policies that limit saturated fatty acids and virtually eliminate industrially produced trans fatty acids in the food supply                                               | x                    | x    | √    | Excluded           |
| c.                                                   | WHO set of recommendations on marketing of foods and non-alcoholic beverages to children                                                                                                    | x                    | x    | √    | Excluded           |
| d.                                                   | Legislation /regulations fully implementing the International Code of Marketing of Breast-milk Substitutes                                                                                  | x                    | x    | √    | Excluded           |
| 8.                                                   | Implemented at least one recent national public awareness programme on diet and/or physical activity                                                                                        | √                    | √    | √    | Included           |
| 9.                                                   | Has evidence-based national guidelines/protocols/standards for the management of major NCDs through a primary care approach, recognized/approved by government or competent authorities     | x                    | √    | √    | Included           |
| 10.                                                  | Has provision of drug therapy, including glycaemic control, and counselling for eligible persons at high risk to prevent heart attacks and strokes, with emphasis on the primary care level | x                    | x    | √    | Excluded           |
