# Supplementary material for: Tracing Africa’s progress towards implementing the Non-Communicable Diseases Global action plan 2013–2020: a synthesis of WHO country profile reports
Source: Springer Nature journal article supplement (doi:10.1186/s12889-017-4199-6), 2017-04-05
Supplement: MOESM3 [file 12202230]

**Additional file 3: WHO definition of indicators and criteria**

| Indicator | Definition                                                                                                                                                                                                                                                                                                                                                                                                                                                                                                                                                                                                                                                                                               | Achievement Criteria                                                                                                                                                                                                                                                                                                                                                                                                                                                                                          |                                                                                                                                                               | Links to WHO tools                                                                                                                                                                                                                                       |
|-----------|----------------------------------------------------------------------------------------------------------------------------------------------------------------------------------------------------------------------------------------------------------------------------------------------------------------------------------------------------------------------------------------------------------------------------------------------------------------------------------------------------------------------------------------------------------------------------------------------------------------------------------------------------------------------------------------------------------|---------------------------------------------------------------------------------------------------------------------------------------------------------------------------------------------------------------------------------------------------------------------------------------------------------------------------------------------------------------------------------------------------------------------------------------------------------------------------------------------------------------|---------------------------------------------------------------------------------------------------------------------------------------------------------------|----------------------------------------------------------------------------------------------------------------------------------------------------------------------------------------------------------------------------------------------------------|
|           |                                                                                                                                                                                                                                                                                                                                                                                                                                                                                                                                                                                                                                                                                                          | Fully achieved                                                                                                                                                                                                                                                                                                                                                                                                                                                                                                | Partly achieved                                                                                                                                               | Links to WHO tools                                                                                                                                                                                                                                       |
| 5.a.      | Country has tobacco excise tax set at a level that accounts for at least 70% of the retail prices of tobacco products.                                                                                                                                                                                                                                                                                                                                                                                                                                                                                                                                                                                   | Country has set an excise tax at least 70% of the retail price.                                                                                                                                                                                                                                                                                                                                                                                                                                               | Country has set an excise tax at least 50% but less than 70% of the retail price.                                                                             | <a href="http://www.who.int/tobacco/global_report/">http://www.who.int/tobacco/global_report/</a><br><a href="http://www.who.int/tobacco/global_report/2013/technical_note_i.pdf">http://www.who.int/tobacco/global_report/2013/technical_note_i.pdf</a> |
| 5. b.     | Country has all public places completely smoke-free (or at least 90% of the population covered by complete subnational smoke-free legislation). "Completely" means that smoking is not permitted, with any exemptions allowed, except in residences and indoor places that serve as equivalents to long-term residential facilities, such as prisons and long-term health and social care facilities such as psychiatric units and nursing homes. Ventilation and any form of designated smoking rooms and/or areas do not protect from the harms of second-hand tobacco smoke, and the only laws that provide protection are those that result in the complete absence of smoking in all public places. | All public places in country are completely smoke-free (or at least 90% of the population covered by complete subnational smoke-free legislation).                                                                                                                                                                                                                                                                                                                                                            | Three to seven public places are completely smoke-free, or the law allows designated smoking rooms with strict technical requirements in five or more places. | <a href="http://www.who.int/tobacco/global_report/">http://www.who.int/tobacco/global_report/</a><br><a href="http://www.who.int/tobacco/global_report/2013/technical_note_i.pdf">http://www.who.int/tobacco/global_report/2013/technical_note_i.pdf</a> |
| 5. c      | Country has large warnings which are defined as covering on average at least 50% of the front and back of the package with all appropriate characteristics.                                                                                                                                                                                                                                                                                                                                                                                                                                                                                                                                              | Country has large health warnings with all appropriate characteristics; specific health warnings mandated; appearing on individual packages as well as on any outside packaging and labelling used in retail sale; describing specific harmful effects of tobacco use on health; are large, clear, visible and legible (e.g. specific colours and font style and sizes are mandated); whether the warnings rotate; include pictures or pictograms; written in (all) the principal language(s) of the country. | Country has medium-size warnings with some or all appropriate characteristics, or large warnings were missing some appropriate characteristics.               | <a href="http://www.who.int/tobacco/global_report/">http://www.who.int/tobacco/global_report/</a><br><a href="http://www.who.int/tobacco/global_report/2013/technical_note_i.pdf">http://www.who.int/tobacco/global_report/2013/technical_note_i.pdf</a> |
| 5.d       | Country has a ban on all forms of direct and indirect advertising. Direct advertising bans include: national television and radio; local magazines and newspapers; billboards and outdoor advertising; point of sale. Indirect advertising bans include: free distribution of tobacco products in the mail or through other means; promotional discounts; non-tobacco goods and services identified with tobacco brand names (brand extension); brand names of non-tobacco products used for tobacco products (brand sharing); appearance of tobacco brands (product placement) or tobacco products in television and/or films; and sponsorship, including corporate social responsibility programmes.   | Country has a ban on all forms of direct and indirect advertising.                                                                                                                                                                                                                                                                                                                                                                                                                                            | Country has a ban on national TV, radio and print media, but not on all other forms of direct and/or indirect advertising.                                    | <a href="http://www.who.int/tobacco/global_report/">http://www.who.int/tobacco/global_report/</a><br><a href="http://www.who.int/tobacco/global_report/2013/technical_note_i.pdf">http://www.who.int/tobacco/global_report/2013/technical_note_i.pdf</a> |

Source : WHO Country Profiles 2015
