# Supplementary material for: Tracing Africa’s progress towards implementing the Non-Communicable Diseases Global action plan 2013–2020: a synthesis of WHO country profile reports
Source: Springer Nature journal article supplement (doi:10.1186/s12889-017-4199-6), 2017-04-05
Supplement: MOESM4 [file 12202230]

**Additional file 4: WHO definition of indicators and criteria**

| Indicator | Definition                                                                                                                                                                                                                                                                                                                                  | Achievement Criteria                                                                                                                                                                                                                                                                                                                                                                                                       |                                                                                                                                                                    | Links to WHO tools                                                                                                                                                                    |
|-----------|---------------------------------------------------------------------------------------------------------------------------------------------------------------------------------------------------------------------------------------------------------------------------------------------------------------------------------------------|----------------------------------------------------------------------------------------------------------------------------------------------------------------------------------------------------------------------------------------------------------------------------------------------------------------------------------------------------------------------------------------------------------------------------|--------------------------------------------------------------------------------------------------------------------------------------------------------------------|---------------------------------------------------------------------------------------------------------------------------------------------------------------------------------------|
|           |                                                                                                                                                                                                                                                                                                                                             | Fully achieved                                                                                                                                                                                                                                                                                                                                                                                                             | Partly achieved                                                                                                                                                    |                                                                                                                                                                                       |
| 6.a       | Country has a licensing system or monopoly on retail sales of beer, wine, spirits. Country has restrictions for on- / off-premise sales of beer, wine, spirits regarding hours, days and locations of sales. Country has legal age limits for being sold and served alcoholic beverages.                                                    | Country has a licensing system or monopoly on retail sales of beer, wine and spirits; and restrictions for on- and off-premise sales of beer, wine and spirits regarding hours and locations of sales and restrictions exist for off-premise sales of beer, wine and spirits regarding days of sales; and legal age limits for being sold and served alcoholic beverages are 18 years or above for beer, wine and spirits. | Country has any but not all the three indicators.                                                                                                                  | <a href="http://www.who.int/entity/substance_abuse/activities/survey_alcohol_health_2012.pdf">http://www.who.int/entity/substance_abuse/activities/survey_alcohol_health_2012.pdf</a> |
| 6.b       | Country has regulatory or co-regulatory frameworks for alcohol advertising through different channels (public service/national TV, commercial/private TV, national radio, local radio, print media, billboards, points of sale, cinema, internet, social media). Country has a detection system for infringements on marketing restrictions | Country has restrictions exist on alcohol advertising for beer, wine and spirits through all channels; and detection system exists for infringements on marketing restrictions.                                                                                                                                                                                                                                            | Country has restrictions on at least public service/national TV, national radio and billboards but no detection system exists for infringements.                   | <a href="http://www.who.int/entity/substance_abuse/activities/survey_alcohol_health_2012.pdf">http://www.who.int/entity/substance_abuse/activities/survey_alcohol_health_2012.pdf</a> |
| 6.c       | Country has excise tax on beer, wine, spirits and adjusts level of taxation for inflation for alcoholic beverages                                                                                                                                                                                                                           | Country has implemented excise tax on all alcoholic beverages (beer, wine and spirits) is implemented; and adjusted level of taxation for inflation for beer, wine and spirits                                                                                                                                                                                                                                             | Country has excise tax on all alcoholic beverages and adjusted the level of taxation for inflation which is implemented on at least one of the alcoholic beverages | <a href="http://www.who.int/entity/substance_abuse/activities/survey_alcohol_health_2012.pdf">http://www.who.int/entity/substance_abuse/activities/survey_alcohol_health_2012.pdf</a> |
| 7.a       | Country has implemented a policy (ies) to reduce population salt/sodium consumption such as product reformulation by industry, regulation of salt content of food, or public awareness programmes.                                                                                                                                          | Country is implementing any policies to reduce population salt consumption                                                                                                                                                                                                                                                                                                                                                 | Not defined                                                                                                                                                        | <a href="http://www.who.int/chp/ncd_capacity/en/">http://www.who.int/chp/ncd_capacity/en/</a>                                                                                         |
| 7. b      | Country has implemented a policy (ies) to limit saturated fatty acids and virtually eliminate industrially produced trans-fats in the food supply                                                                                                                                                                                           | Country is implementing national policies that limit saturated fatty acids and virtually eliminate industrially produced trans-fats (i.e. partially hydrogenated vegetable oils) in the food supply.                                                                                                                                                                                                                       | Not defined                                                                                                                                                        | <a href="http://www.who.int/chp/ncd_capacity/en/">http://www.who.int/chp/ncd_capacity/en/</a>                                                                                         |

**Source : WHO Country Profiles 2015**
